# Supplementary material
Source: Royal Society of Chemistry journal article supplement (doi:10.1039/d5ja00425j)

**Preparation of rutile reference materials for *in-situ* elemental and**

**Hf-Ti isotopic microanalysis using Spark Plasma Sintering**

**Hong Liu,<sup>a</sup> XianLi Zeng,<sup>a</sup> Tao Luo,<sup>\*a</sup> Liyuan Qing,<sup>a</sup> Lingyi Huang,<sup>a</sup> Wen**

**Zhang,<sup>a</sup> Ming Li,<sup>a</sup> Zhenli Zhu<sup>b</sup> and Zhaochu Hu<sup>a</sup>**

**a State Key Laboratory of Geological Processes and Mineral Resources, China**

**University of Geosciences, Wuhan 430075, PR China**

**b State Key Laboratory of Biogeology and Environmental Geology, China University**

**of Geosciences, Wuhan 430075, PR China**

E-mail: luotao11@cug.edu.cn

\*: Corresponding author

**Submitted to *Journal of Analytical Atomic Spectrometry***

**Supplementary Figures, including Fig. S1, Fig. S2, and Fig. S3**

## **Figure captions**

Fig. S1. Photographs of the initial rutile crystals.

Fig. S2. Photographs of (a) initial crystal, (b) pressed powder pellet, and (c) sintering-synthesized pellet of rutile RGPMR.

Fig. S3. Back-Scattered Electron (BSE) images of the three sample types of rutile RGPMR ablated using both nanosecond and femtosecond laser ablation.

Fig. S1

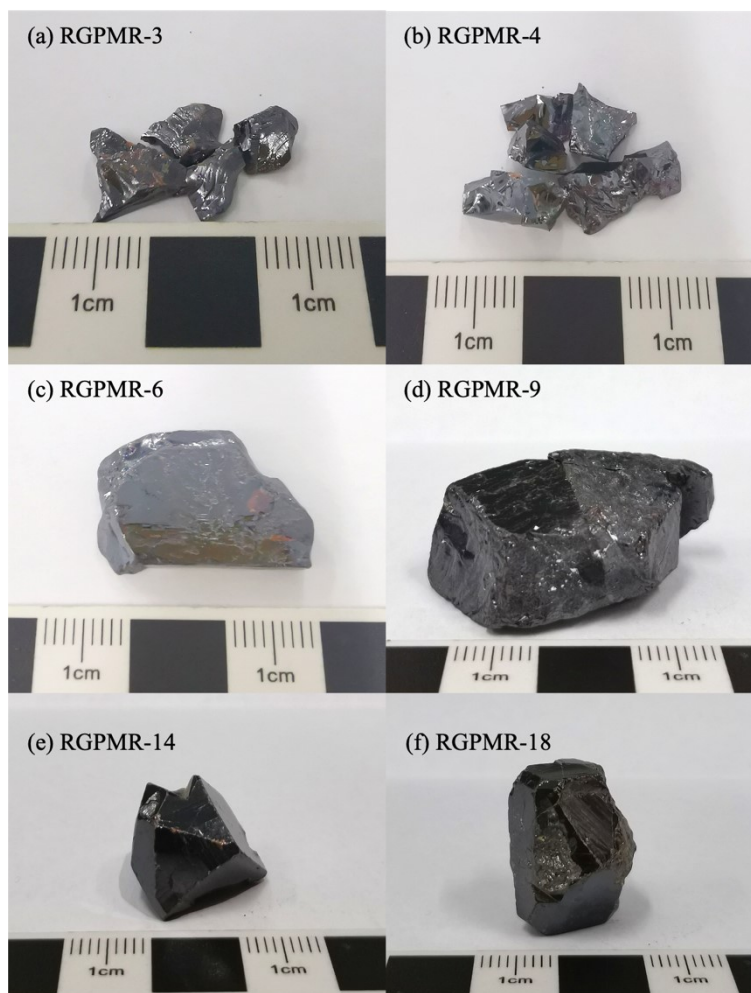

Fig. S2

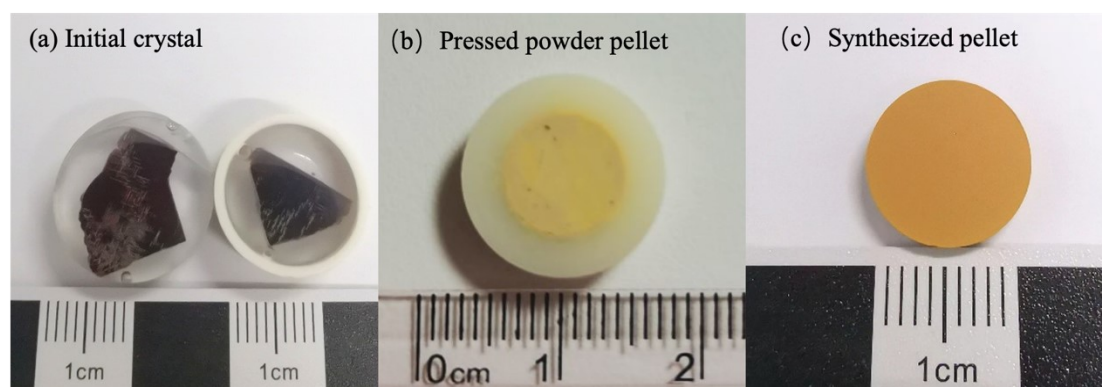

Fig. S3

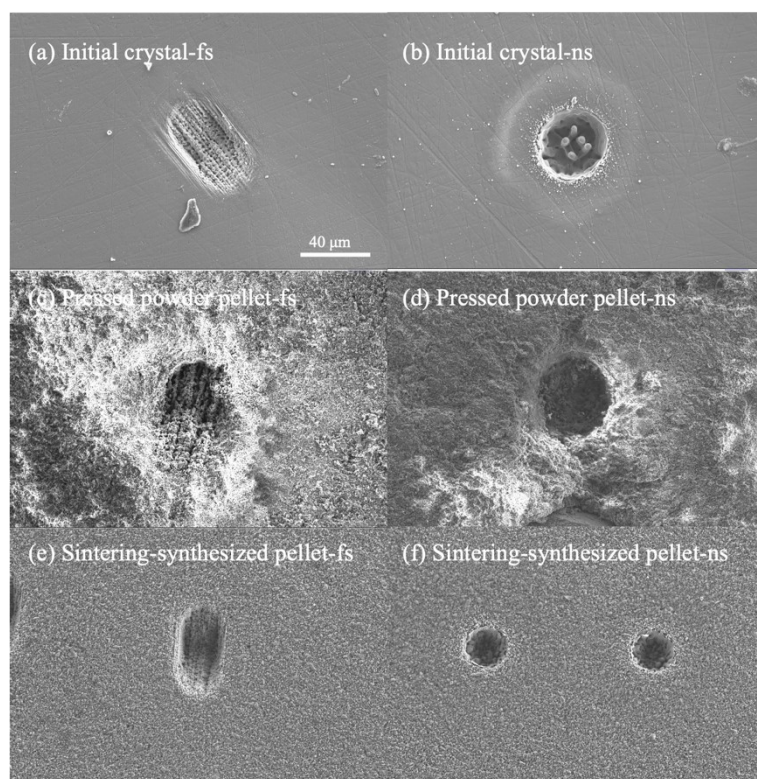

Supplement: d5ja00425j1.pdf [file d5ja00425j1.pdf]
