# Supplementary material
Source: Royal Society of Chemistry journal article supplement (doi:10.1039/d5ja00425j)
Supplement: d5ja00425j2.xlsx [file d5ja00425j2.xlsx]

## Sheet: Table S1
	Table S1 The elemental mass fractions in rutile RGPMR measured by solution-based ICP-MS and EPMA analysis.
	Elements	Units	RGPMR-1	RGPMR-2	RGPMR-3	RGPMR-4	RGPMR-5	RGPMR-6	RGPMR-7	RGPMR-8	RGPMR-9	RGPMR-10		Average	SD	RSD (%)	n
Solution-based ICP-MS	Sc	μg g-1	284.124	283.918	328.122	314.228	305.738	322.479	320.249	326.984	308.206	332.777		312.683	16.4728	5.26822	10
	V	μg g-1	1538.42	1373.32	1616.26	1616.42	1390.52	1427.38	1420.31	1456.5	1368.28	1470		1467.74	82.8512	5.64481	10
	Cr	μg g-1	2802.32	2535.82	2906.02	2903.21	2456.68	2450.51	2401.23	2453.9	2346.55	2540.09		2579.63	186.82	7.24211	10
	FeO	% m/m	1.24431	1.11503	1.08259	1.2652	1.24386	1.09368	1.09196	1.0467	1.07255	1.17913		1.1435	0.081213	7.10214	10
	Zr	μg g-1	716.662	720.676	825.416	784.049	759.883	785.801	784.661	748.756	781.497	829.483		773.688	38.2473	4.9435	10
	Nb	μg g-1	8997.43	8787.92	9394.48	10182.3	9121.35	8603.61	8690.13	8502.17	7798.7	8095.35		8817.34	646.033	7.32684	10
	Sn	μg g-1	630.857	626.452	625.325	758.145	685.339	787.948	710.288	653.559	712.39	753.996		694.43	69.5044	10.0088	10
	Hf	μg g-1	36.777	34.385	38.8527	38.8057	35.8118	36.1118	36.101	37.4382	36.092	37.6308		36.8006	1.82184	4.95058	10
	Ta	μg g-1	779.757	759.668	808.98	861.37	788.451	650.154	645.546	727.051	660.147	634.301		731.542	62.936	8.60319	10
	W	μg g-1	727.162	910.845	954.999	991.555	962.956	741.656	785.585	727.84	686.289	726.387		821.527	115.861	14.1031	10
	U	μg g-1	18.7011	17.1426	18.7616	18.1789	18.519	18.6841	18.6286	18.8685	17.9944	18.8617		18.434	0.926904	5.02822	10
	Elements	UO2	CaO	Sc2O3	TiO2	Al2O3	SiO2	HfO2	FeO	MnO	Cr2O3	V2O3	Na2O	MgO	PbO	Nb2O5	ZrO2	WO3	Ta2O5	Total
		% m/m	% m/m	% m/m	% m/m	% m/m	% m/m	% m/m	% m/m	% m/m	% m/m	% m/m	% m/m	% m/m	% m/m	% m/m	% m/m	% m/m	% m/m	% m/m
EPMA	RGPMR-1	0.0113	-	0.0531	97.3435	0.0199	0.0759	-	0.7243	0.0162	0.357	0.2649	0.0114	-	0.0111	1.0559	0.1202	-	0.1367	100.201
	RGPMR-2	-	0.0124	0.0216	96.792	0.0339	0.0283	-	0.8486	-	0.3029	0.2383	-	0.007	-	1.5236	0.0091	0.0292	0.0638	99.9107
	RGPMR-3	0.0431	0.0238	0.0121	96.7655	0.0177	0.0562	-	0.8132	0.0137	0.4209	0.3358	-	-	-	1.2198	0.1529	0.0583	-	99.9331
	RGPMR-4	0.0205	0.0082	0.0456	97.9752	0.0015	-	-	0.7049	-	0.2956	0.267	-	0.0096	0.0236	0.9715	-	0.1583	0.0228	100.504
	RGPMR-5	0.0416	0.0054	0.031	96.8486	0.0196	0.0365	0.08	0.7183	0.0009	0.442	0.4588	-	-	0.0155	1.0135	0.124	0.1877	0.0091	100.032
	RGPMR-6	0.0245	0.0258	0.035	97.6098	-	-	0.0311	0.6757	0.0085	0.3101	0.3955	0.013	-	-	1.1315	0.1238	0.0792	0.0729	100.536
	RGPMR-7	-	0.0125	-	97.7134	0.0129	-	-	0.7801	0.0051	0.1484	0.2546	-	-	0.0185	1.1162	0.0674	0.0625	0.0456	100.237
	RGPMR-8	-	-	0.0202	96.6931	0.0208	-	0.0466	0.5745	-	0.514	0.3042	0.0065	-	-	1.1919	0.182	0.1125	0.1183	99.7847
	Average	-	-	-	97.2176	-	-	-	0.72995	-	-	0.314887	-	-	-	1.15299	-	-	-
	SD				0.472525				0.0801766			0.0725025				0.160844
	RSD				0.486049				10.9839			23.0249				13.9502
"-". The value was below 0.0005% m/m.

## Sheet: Table S2
Table S2 The elemental mass fractions of initial crystals and sintering-synthesized pellets of rutile RGPMR measured by LA-ICP-MS.
Sample ID	Sc	TiO2	V	Cr	FeO	Zr	Nb	Sn	Hf	Ta	W	U
	45	47	51	53	57	91	93	118	178	181	182	238
	μg g-1	% m/m	μg g-1	μg g-1	% m/m	μg g-1	μg g-1	μg g-1	μg g-1	μg g-1	μg g-1	μg g-1
initial crystal-RGPMR-14	125.516	96.6021	817.855	295.763	1.05993	190.75	7352.36	2264.81	11.5157	381.897	1148.64	20.8891
initial crystal-RGPMR-14	109.828	96.4153	891.468	308.135	1.08911	186.145	8264.67	2211.8	10.9607	471.708	1246.21	22.3581
initial crystal-RGPMR-14	152.991	96.6711	437.281	330.689	1.2481	223.117	7396.35	1865.07	13.3687	403.963	568.185	12.8988
initial crystal-RGPMR-14	147.18	96.8296	459.914	317.745	1.15097	206.687	7202.07	1589.36	12.5634	378.174	492.559	11.802
initial crystal-RGPMR-14	143.423	97.0359	474.189	320.229	1.09927	201.007	7132.74	1425.65	12.6276	372.425	418.761	10.3638
initial crystal-RGPMR-14	153.218	97.0977	540.93	335.305	1.05392	188.399	7212.72	1112.19	11.4915	352.007	330.99	8.42571
initial crystal-RGPMR-14	123.261	96.5199	834.208	276.925	1.05069	192.308	7303.2	2219.5	11.9475	389.812	1175.73	20.8027
initial crystal-RGPMR-14	108.337	96.4873	892.033	315.809	1.04875	201.181	7789.89	2334.66	11.7435	354.841	1195.54	23.4197
initial crystal-RGPMR-14	121.043	97.7314	1238.02	515.001	0.849927	214.556	4810.33	406.366	11.823	191.561	376.076	15.9934
initial crystal-RGPMR-14	114.828	97.9642	1120.21	483.135	0.792353	201.675	4517.55	381.685	11.127	173.917	361.596	14.8071
initial crystal-RGPMR-14	102.679	98.0584	1057.13	427.993	0.732841	191.167	4147.96	325.656	9.75035	161.614	326.604	13.5729
initial crystal-RGPMR-14	93.6275	98.2051	958.686	395.352	0.672376	175.112	3778.31	309.232	9.27803	146.599	298.444	12.0963
initial crystal-RGPMR-14	86.3761	98.3512	887.235	369.816	0.630299	157.111	3459.99	287.66	8.35589	134.375	275.05	11.7373
initial crystal-RGPMR-14	121.209	96.5913	855.985	281.788	1.0642	201.304	7405.21	2260.59	12.2235	401.955	1174.04	21.3587
initial crystal-RGPMR-14	110.272	96.5349	883.214	291.257	1.02416	193.202	7781.37	2263.07	12.2437	350.686	1147.02	22.7131
initial crystal-RGPMR-14	134.159	96.1059	482.503	327.477	1.44801	197.75	6516.68	2352.86	11.8029	395.462	1396.78	24.249
initial crystal-RGPMR-14	131.228	95.8612	487.301	296.009	1.43906	190.183	6624.35	2371.31	11.7016	378.917	1367.84	24.3088
initial crystal-RGPMR-14	130.505	96.2935	498.469	315.856	1.43945	197.789	6915.68	2421.79	11.7134	380.123	1366.56	24.6924
initial crystal-RGPMR-14	131.817	96.1614	491.686	305.039	1.28574	200.273	6674.65	2421.55	12.6577	388.092	1409.69	25.4019
initial crystal-RGPMR-14	124.388	96.3067	495.677	303.226	1.31701	195.989	6837.71	2226.36	12.2607	373.443	1353.48	23.2821
initial crystal-RGPMR-14	127.268	96.0785	541.903	297.7	1.40389	208.458	7399.9	2531.09	11.8577	338.101	1060.49	25.8183
initial crystal-RGPMR-14	128.53	95.8398	519.896	351.883	1.45272	211.317	7696.86	2836.31	11.7982	367.279	1078.21	24.9838
initial crystal-RGPMR-14	132.674	95.9666	514.143	309.278	1.3263	214.429	7810.5	2797.95	13.937	374.578	1030.08	28.6313
initial crystal-RGPMR-14	136.712	96.1451	514.885	284.318	1.26367	216.795	7591.97	2787.36	12.6188	377.266	1005.85	23.1807
initial crystal-RGPMR-6	131.956	95.9289	567.568	315.829	1.39194	219.501	7830.47	2779.4	12.1055	396.554	1361	27.8434
initial crystal-RGPMR-6	117.257	96.6135	866.479	281.271	1.05946	192.925	7458.97	2311.23	11.7523	407.029	1209.69	21.4852
initial crystal-RGPMR-6	73.306	98.2246	251.144	168.097	0.684489	111.639	3400.22	1213.25	6.70407	196.594	552.051	11.1652
initial crystal-RGPMR-6	82.7423	98.0191	284.283	187.163	0.755337	123.296	4019.06	1344.54	7.98715	166.219	473.861	12.6916
initial crystal-RGPMR-6	89.8341	97.8732	313.27	184.38	0.837711	128.674	4209.75	1459.1	8.34747	223.816	557.327	12.0482
initial crystal-RGPMR-6	98.2557	97.6384	346.086	201.479	0.908998	144.803	4550.42	1579.16	8.99287	240.007	594.185	13.0181
initial crystal-RGPMR-6	106.76	97.5088	369.914	228.861	0.964707	153.673	4908.16	1687.91	9.77682	259.962	644.141	14.2881
initial crystal-RGPMR-6	117.305	96.4747	829.655	264.85	1.11122	173.971	7934.47	2099.85	10.3988	434.281	1330.91	23.3697
initial crystal-RGPMR-6	111.858	96.5108	864.365	249.734	1.07344	188.107	7553.41	2173.48	11.1659	389.533	1281.49	23.3327
initial crystal-RGPMR-6	112.821	96.5786	850.041	275.016	1.08629	194.901	7422.45	2312.67	10.7028	380.616	1283.67	23.1404
initial crystal-RGPMR-9	203.591	97.0498	1703.48	3634.09	0.744421	663.408	6003.8	41.0868	33.8079	428.7	389.983	21.2389
initial crystal-RGPMR-9	222.18	96.8086	1859.75	3833.93	0.819045	722.674	6479.31	44.3312	36.252	465.838	430	23.0155
initial crystal-RGPMR-9	229.634	96.6531	1956.48	3994.81	0.824998	748.172	6741.14	45.4953	38.5413	466.853	439.604	24.7991
initial crystal-RGPMR-9	246.568	96.4496	2104.91	4313.5	0.88513	771.468	7191.73	49.1545	40.3288	506.187	474.731	25.5628
initial crystal-RGPMR-9	260.833	96.1425	2303.61	4748.54	0.969317	832.675	7771.86	52.9191	44.0577	538.791	520.953	27.6936
initial crystal-RGPMR-9	304.656	95.9969	2082.66	4483.35	0.978105	982.694	8693.07	55.9146	49.0506	691.697	507.918	24.6019
initial crystal-RGPMR-9	298.072	95.9081	2048.27	4630.12	0.998089	990.227	8852.83	52.6606	49.196	683.855	529.162	25.4788
initial crystal-RGPMR-9	286.864	96.0633	2011.65	4594.53	0.998302	994.989	7980.57	52.505	47.6481	659.978	594.514	26.956
initial crystal-RGPMR-9	286.622	96.1772	1983.58	4619.77	0.953932	973.6	7993.01	55.2812	48.3935	650.306	610.411	27.0028
initial crystal-RGPMR-9	287.683	96.2739	1902.51	4609.91	0.816728	988.795	8048.8	54.2221	48.9706	661.003	597.278	27.9575
initial crystal-RGPMR-9	416.728	95.5814	2656.74	2954.64	1.08884	883.276	10981.7	76.8137	46.7138	1451.81	282.644	15.3108
initial crystal-RGPMR-9	409.869	95.6458	2621.46	2980.36	1.09133	880.421	10868.8	78.4158	45.5114	1311.98	290.313	16.0899
initial crystal-RGPMR-9	398.357	95.5729	2628.71	3067.76	1.07384	876.575	10715.3	79.3757	44.5663	1368.48	298.526	16.1532
initial crystal-RGPMR-9	396.677	95.6694	2605.08	3232.22	1.10344	893.796	10833.5	75.1659	45.5702	1156.6	309.899	17.0085
initial crystal-RGPMR-9	396.626	95.5826	2577.41	3194.93	1.06327	884.975	10969	72.4274	46.7558	1257.78	322.907	17.1881
initial crystal-RGPMR-9	111.05	96.6005	846.246	263.134	1.03914	187.504	7408.65	2354.39	11.0141	392.632	1312.26	24.1811
initial crystal-RGPMR-9	289.763	95.6361	2192.84	4709.32	0.948337	1041.75	7765.24	47.5082	52.0292	523.708	697.754	29.2219
initial crystal-RGPMR-9	281.251	95.7931	2167.52	4603.93	0.89945	1029.15	7371.14	53.493	51.7817	522.76	663.473	28.191
initial crystal-RGPMR-9	274.659	95.8071	2118.89	4558.62	0.908434	1003.59	7378.95	47.5899	49.8231	540.135	668.493	27.5171
initial crystal-RGPMR-9	279.276	95.8314	2095.19	4567.53	0.914458	1005.77	7682.56	46.005	50.2054	613.436	654.338	26.6273
initial crystal-RGPMR-9	277.166	95.7519	2058.37	4520.09	0.913835	978.118	7659.02	47.6043	48.8014	602.014	640.452	25.7041
initial crystal-RGPMR-9	281.689	95.775	2034.47	4525.11	0.911855	978.229	7640.96	47.3665	48.8716	601.916	681.931	25.5986
initial crystal-RGPMR-9	285.195	95.7994	1994.63	4457.01	0.920042	948.947	8113.97	49.7613	47.9943	647.815	602.744	23.9984
initial crystal-RGPMR-9	290.331	95.7143	2012.38	4518.31	0.928629	954.958	8412.84	51.7102	47.7056	662.463	599.058	23.4893
initial crystal-RGPMR-4	145.972	95.8057	465.299	316.924	1.28981	222.439	8334.62	2579.53	13.2855	410.18	1011.09	20.6924
initial crystal-RGPMR-4	141.609	95.8746	599.675	314.372	1.24859	205.822	7295.19	2293.42	12.3372	375.677	1461.09	23.4566
initial crystal-RGPMR-4	136.399	95.8921	734.454	304.273	1.12109	197.941	7255.59	2186.48	11.8969	362.629	1427.85	22.7735
initial crystal-RGPMR-4	143.696	96.2214	500.364	334.559	1.06927	239.346	6474.57	2405.86	13.5979	417.709	1740.5	27.0166
initial crystal-RGPMR-4	146.338	95.7462	493.484	336.138	1.25229	211.285	8020.54	2455.41	13.3089	373.757	1043.31	23.3444
initial crystal-RGPMR-4	143.075	96.1356	477.873	428.768	1.056	216.814	7191.52	2468.28	13.4567	392.317	1231.82	22.8921
initial crystal-RGPMR-4	148.658	95.9462	488.568	342.681	1.13879	231.18	8413.6	2545.34	25.0465	401.359	1082.18	23.5782
initial crystal-RGPMR-4	151.651	95.2228	489.837	346.898	1.47038	226.94	8789.3	2653.74	14.0211	459.588	1131.62	23.9712
initial crystal-RGPMR-4	130.618	96.6566	798.781	306.839	1.06412	196.127	7290.52	2267.09	12.1666	376.785	1134.98	20.5714
initial crystal-RGPMR-4	110.901	96.2895	911.421	329.415	1.07031	189.842	8214.66	2312.16	11.5374	358.255	1192.31	22.2294
initial crystal-RGPMR-4	104.701	96.5811	810.277	261.809	1.09433	192.41	7535.12	2284.6	11.8204	359.287	1097.36	21.267
initial crystal-RGPMR-4	116.134	96.6027	817.139	274.151	1.06231	189.685	7403.88	2389.57	11.5584	379.876	1325.9	22.9955
initial crystal-RGPMR-4	162.489	96.314	562.421	373.728	1.28949	258.442	9348.44	2366.95	15.4907	399.952	711.937	18.0052
initial crystal-RGPMR-4	162.664	96.3329	548.247	363.597	1.2475	256.322	9273.44	2489.91	15.039	359.037	704.684	18.5339
initial crystal-RGPMR-4	162.853	96.3828	541.097	353.619	1.2539	250.664	9044.86	2596.92	15.2027	362.761	704.599	18.9197
initial crystal-RGPMR-4	153.7	96.3576	527.241	331.358	1.21566	242.795	8882.09	2690.98	14.8855	345.794	728.884	19.6912
initial crystal-RGPMR-4	159.666	96.2714	522.834	338.822	1.37458	251.517	8988.23	2508.85	14.5537	363.611	696.263	18.7756
initial crystal-RGPMR-4	431.659	96.5042	879.765	1068.88	1.20841	333.263	8887.98	322.766	19.0171	862.517	169.912	5.32052
initial crystal-RGPMR-4	420.919	95.8152	977.746	1179.77	1.35296	353.181	11626	402.053	21.4391	1334.46	195.998	8.29539
initial crystal-RGPMR-4	434.223	95.7321	1078	1127.77	1.38534	341.691	12456.9	316.351	19.9105	1005.24	163.038	6.89553
initial crystal-RGPMR-4	360.747	96.3482	1003.6	1239.46	1.17905	627.517	9500.23	268.863	30.8504	492.952	434.123	15.304
initial crystal-RGPMR-4	377.832	96.1602	1139.31	1344.03	1.27589	633.19	10162.6	254.951	32.2122	532.061	412.125	15.5136
initial crystal-RGPMR-3	147.024	96.2065	440.491	319.65	1.36743	226.659	8433.23	2800.07	13.9264	409.916	750.616	18.683
initial crystal-RGPMR-3	145.096	96.239	437.561	326.497	1.40165	230.637	8402.8	2838.69	13.5711	346.701	652.729	16.2192
initial crystal-RGPMR-3	150.704	96.2378	435.888	323.354	1.36706	236.686	8447.35	2882.19	13.7694	347.374	669.856	16.2744
initial crystal-RGPMR-3	146.659	96.2823	437.377	335.799	1.42326	234.286	8501.95	2942.91	13.8062	346.616	669.188	16.3545
initial crystal-RGPMR-3	149.512	96.2402	435.186	334.127	1.39539	232.997	8517.11	2899.41	14.2387	353.201	664.097	16.9154
initial crystal-RGPMR-3	154.763	96.4011	438.496	373.087	1.26196	240.26	8706.14	2865.03	14.1696	388.304	743.491	18.9226
initial crystal-RGPMR-3	145.697	96.4926	432.85	355.606	1.15916	222.095	8574.31	2781.22	14.0197	387.653	727.593	17.3947
initial crystal-RGPMR-3	152.821	96.3558	436.655	350.699	1.26599	230.243	8802.76	2825.42	14.2242	388.993	728.916	17.8708
initial crystal-RGPMR-3	153.193	96.3219	433.567	359.199	1.38986	252.662	8744.41	2735.6	15.1519	382.966	676.002	17.8681
initial crystal-RGPMR-3	162.237	96.3526	428.988	350.203	1.27167	245.839	9020.96	2759.64	14.5648	402.276	674.138	17.2446
initial crystal-RGPMR-3	137.091	96.538	568.054	320.291	1.32693	196.803	7724.31	2497.16	11.8057	382.816	1079.45	20.7801
initial crystal-RGPMR-3	140.236	96.4185	548.003	324.621	1.34042	206.65	7811.95	2500.63	12.9488	365.027	870.296	22.7996
initial crystal-RGPMR-3	141.774	96.4376	543.075	315.046	1.37473	218.672	7865.99	2470.21	12.902	364.557	873.599	22.7074
initial crystal-RGPMR-3	138.799	96.3566	528.204	302.991	1.39282	217.085	7884.07	2646.18	12.5046	363.056	887.281	23.1653
initial crystal-RGPMR-3	142.934	96.3351	522.031	314.348	1.35014	216.675	7881.12	2531.42	13.2365	361.625	879.385	21.9661
initial crystal-RGPMR-18	141.783	96.5611	563.211	333.366	1.21986	209.292	7672.59	2529.43	34.795	401.805	1415.89	24.5621
initial crystal-RGPMR-18	139.338	96.6622	553.488	323.485	1.2219	224.598	6824.02	2556.68	36.5909	384.688	1292.89	23.8767
initial crystal-RGPMR-18	137.275	96.3861	569.486	313.638	1.34435	222.647	6858.16	2595.75	37.8344	381.264	1251.25	23.3733
initial crystal-RGPMR-18	136.418	96.4265	497.095	325.783	1.30249	211.564	7659.55	2618.11	28.1832	419.293	1466.49	25.0488
initial crystal-RGPMR-18	144.327	96.5949	486.112	337.411	1.27298	212.979	7540.73	2586.38	38.2051	405.199	1285.01	22.2593
Average	184.027	96.4055	981.077	1242.85	1.12779	381.617	7707.32	1635.18	21.9597	468.493	820.718	20.4508
SD	93.2575	0.630252	686.878	1625.98	0.20793	302.874	1633.59	1107.12	14.6899	253.461	381.517	5.33039
RSD (%)	50.676	0.653751	70.0127	130.826	18.4368	79.366	21.1953	67.7062	66.8948	54.1014	46.4858	26.0644
n	100	100	100	100	100	100	100	100	100	100	100	100
Synthesized pellet-RGPMR-1	304.523	93.9878	1569.18	2832.52	1.13494	735.97	9709.35	730.186	37.1874	786.739	884.528	20.3359
Synthesized pellet-RGPMR-1	305.866	94.1594	1572.74	2822.94	1.13039	753.673	9687.6	699.765	36.52	785.936	818.779	20.3498
Synthesized pellet-RGPMR-1	301.321	94.1407	1611.28	2804.26	1.13345	707.263	9588.98	765.861	39.069	768.722	813.88	20.3605
Synthesized pellet-RGPMR-1	303.971	94.0028	1557.59	2708.82	1.13218	712.711	9549.18	714.599	35.4617	777.824	885.727	19.6629
Synthesized pellet-RGPMR-1	297.485	94.0842	1548.12	2775.39	1.13181	720.974	9449.9	705.508	36.3211	767.147	750.83	19.6176
Synthesized pellet-RGPMR-1	297.745	94.1748	1584.26	2692.21	1.12445	729.777	9542.92	771.283	37.354	775.606	809.776	20.0855
Synthesized pellet-RGPMR-1	292.599	94.2414	1666.77	2756.89	1.09408	710.831	9441.79	780.067	37.0158	772.029	957.628	19.7471
Synthesized pellet-RGPMR-1	290.148	94.3637	1492.07	2673.21	1.10538	676.918	9209.34	742.095	35.8222	747.348	798.856	19.9138
Synthesized pellet-RGPMR-1	286.675	94.3475	1509	2651.23	1.08642	687.203	9070.49	783.472	35.3359	733.041	812.744	19.9467
Synthesized pellet-RGPMR-1	296.375	94.4357	1517.1	2715.35	1.16326	688.024	9335.2	762.007	35.1192	753.682	929.65	19.4866
Synthesized pellet-RGPMR-1	285.287	94.3419	1477.96	2681.95	1.07361	691.356	9246.45	711.097	35.0177	748.099	765.899	18.9663
Synthesized pellet-RGPMR-2	283.98	94.3488	1476.56	2641.07	1.10186	685.811	9125.52	711.173	34.99	736.544	761.469	18.8751
Synthesized pellet-RGPMR-2	268.672	93.8221	1569.51	2823.13	1.25315	633.034	9694.06	870.064	31.5798	722.88	879.014	21.2111
Synthesized pellet-RGPMR-2	265.72	94.3854	1560.97	2963.06	1.31353	699.225	9029.06	916.145	37.4283	795.106	956.583	19.4455
Synthesized pellet-RGPMR-2	290.649	94.2581	1567.21	2728.47	1.18061	717.032	9515.89	735.876	33.9596	824.247	906.741	21.2619
Synthesized pellet-RGPMR-2	293.56	94.1602	1537.19	2707.46	1.19989	708.185	9609.94	785.408	35.8299	825.426	700.929	20.9646
Synthesized pellet-RGPMR-2	291.639	94.2876	1522.43	2734.43	1.21088	741.584	9369.57	758.617	36.4927	817.651	792.116	20.4284
Synthesized pellet-RGPMR-2	294.63	94.2038	1526.93	2740.54	1.19713	728.33	9399.32	724.995	36.4806	812.906	829.203	21.3768
Synthesized pellet-RGPMR-2	294.37	94.4564	1534.22	2655.18	1.17566	722.282	9350.55	727.37	35.6577	816.735	751.099	20.523
Synthesized pellet-RGPMR-2	300.068	94.1078	1536.74	2736.43	1.2115	739.85	9541.35	771.529	35.7271	823.861	796.085	21.3332
Synthesized pellet-RGPMR-2	291.137	94.3443	1513.87	2717.9	1.17873	721.139	9364.48	723.976	35.1555	809.553	751.602	21.4308
Synthesized pellet-RGPMR-2	290.332	94.4225	1523.3	2722.73	1.138	739.361	9448.64	708.398	36.9728	829.689	695.996	21.1247
Synthesized pellet-RGPMR-3	287.361	94.3795	1521.85	2608.13	1.17725	733.488	9054.65	742.329	35.8659	792.357	790.769	20.8235
Synthesized pellet-RGPMR-3	285.141	94.1834	1525.48	2766.08	1.18304	726.865	9471.71	769.551	35.8419	832.224	689.036	21.0017
Synthesized pellet-RGPMR-3	290.561	94.2684	1511.12	2679.86	1.19324	720.758	9304.96	734.567	35.3975	819.288	681.063	20.6132
Synthesized pellet-RGPMR-3	290.507	94.305	1489.86	2682.05	1.19802	724.265	9498.76	729.383	36.3955	830.427	889.382	17.6482
Synthesized pellet-RGPMR-3	285.828	94.4161	1508.67	2670.1	1.16975	722.129	9283.72	717.367	35.4092	807.316	693.965	20.7799
Synthesized pellet-RGPMR-3	281.169	94.4505	1470.74	2632.45	1.15912	692.358	9160.39	707.049	34.0351	781.164	722.221	21.2401
Synthesized pellet-RGPMR-3	285.157	94.4295	1483.52	2622.03	1.1237	704.371	9141.27	636.417	35.2708	787.814	712.508	19.9719
Synthesized pellet-RGPMR-3	268.782	93.8535	1562.66	2839.99	1.29613	643.776	9110.76	925.862	30.391	756.99	729.028	20.3018
Synthesized pellet-RGPMR-3	271.569	94.5873	1552.38	2925.83	1.13347	658.427	9244.22	810.438	38.3511	741.846	774.423	20.2654
Synthesized pellet-RGPMR-3	274.838	95.3961	1479.12	2592.34	1.03672	708.697	8939.4	688.068	36.5919	801.741	723.485	18.2514
Synthesized pellet-RGPMR-3	282.628	95.1714	1576.27	2625.9	1.06846	719.499	9196.64	690.457	36.2623	806.536	720.647	17.313
Synthesized pellet-RGPMR-4	267.838	95.3143	1453.66	2569.85	1.04005	756.883	8805.49	670.495	36.2625	765.883	704.345	16.9919
Synthesized pellet-RGPMR-4	276.163	95.2793	1539.22	2665.96	1.05725	700.426	8979.98	740.39	35.312	780.793	713.776	17.5237
Synthesized pellet-RGPMR-4	278.931	95.3272	1498.71	2673.18	1.06598	706.828	9127.39	700.984	35.4397	784.624	693.922	17.9076
Synthesized pellet-RGPMR-4	273.886	95.784	1533.94	2608.04	1.01781	691.63	8909.23	695.74	35.0779	784.064	665.28	17.6507
Synthesized pellet-RGPMR-4	272.632	95.8232	1514.94	2652.96	1.02565	690.552	8890.52	744.217	34.955	774.369	678.846	17.4551
Synthesized pellet-RGPMR-4	275.277	95.9015	1519.05	2650.56	1.02861	708.165	8987.82	688.632	35.8576	801.879	784.129	17.9038
Synthesized pellet-RGPMR-4	284.017	95.9599	1518.79	2673.66	1.04237	730.336	9178.66	701.094	37.2879	820.383	796.39	18.6076
Synthesized pellet-RGPMR-4	275.79	95.9509	1499.3	2611.62	1.02676	706.602	8919.6	699.763	35.3817	803.464	748.973	18.1726
Synthesized pellet-RGPMR-4	276.004	95.8545	1541.49	2591.18	1.04111	699.506	9204.42	707.349	35.3875	787.711	771.675	18.3806
Synthesized pellet-RGPMR-4	280.491	95.8337	1548.49	2581.78	1.05263	710.729	9141.38	764.402	36.4284	813.19	719.095	17.8571
Synthesized pellet-RGPMR-4	277.184	95.8324	1517.7	2595.77	1.04193	709.628	9166.84	704.638	37.2747	804.379	751.207	18.3898
Average	285.648	94.6677	1530.5	2700.1	1.12841	709.465	9272.67	740.197	35.7949	788.846	777.348	19.5795
SD	10.5363	0.670234	39.3496	88.141	0.073051	25.1891	236.477	56.1793	1.45844	28.6587	76.6454	1.33546
RSD (%)	3.68856	0.707986	2.57103	3.26436	6.4738	3.55044	2.55025	7.58977	4.07443	3.63299	9.85986	6.82072
n	44	44	44	44	44	44	44	44	44	44	44	44

## Sheet: Table S3
Table S3 The Hf isotopic compositions of ultrafine powder of rutile RGPMR measured by solution-based MC-ICP-MS.
Sample ID	Types	176Hf/177Hf	2SE
RGPMR-1	ultrafine powder	0.28176	1.06155e-05
RGPMR-1	ultrafine powder	0.281757	1.06078e-05
RGPMR-1	ultrafine powder	0.281757	1.14752e-05
RGPMR-1	ultrafine powder	0.281758	1.1661e-05
RGPMR-2	ultrafine powder	0.281744	7.30254e-06
RGPMR-2	ultrafine powder	0.281759	8.8081e-06
RGPMR-2	ultrafine powder	0.281753	7.39093e-06
RGPMR-2	ultrafine powder	0.281745	1.01214e-05
RGPMR-2	ultrafine powder	0.281742	7.03942e-06
RGPMR-2	ultrafine powder	0.281748	8.1078e-06
RGPMR-2	ultrafine powder	0.281758	9.06859e-06
Average		0.281753
2SD		1.29001e-05
n		11
BCR-2	reference material	0.282876	5.87905e-06

## Sheet: Table S4
Table S4 The Hf isotopic compositions of initial crystals and sintering-synthesized pellets of rutile RGPMR measured by fs-LA-MC-ICP-MS.
Sample ID	176Hf/177Hf	2SE	180Hf signal intensity
initial crystal-RGPMR-9	0.281692	0.000137617	0.21488
initial crystal-RGPMR-9	0.28189	0.000138178	0.21882
initial crystal-RGPMR-9	0.281714	0.000138041	0.227744
initial crystal-RGPMR-9	0.281689	0.00010468	0.243264
initial crystal-RGPMR-9	0.281649	0.000129013	0.244503
initial crystal-RGPMR-9	0.281855	0.000125197	0.241522
initial crystal-RGPMR-9	0.281847	0.000119353	0.251291
initial crystal-RGPMR-9	0.281683	0.000108517	0.256065
initial crystal-RGPMR-9	0.281653	9.91469e-05	0.258998
initial crystal-RGPMR-9	0.281595	0.00010983	0.264539
initial crystal-RGPMR-9	0.281826	0.000113868	0.275408
initial crystal-RGPMR-9	0.281571	0.000104931	0.286554
initial crystal-RGPMR-9	0.281686	9.43522e-05	0.29456
initial crystal-RGPMR-9	0.281673	0.00010464	0.286893
initial crystal-RGPMR-9	0.281615	9.33148e-05	0.283727
initial crystal-RGPMR-9	0.281774	0.000105393	0.254623
initial crystal-RGPMR-9	0.281608	0.000103755	0.258419
initial crystal-RGPMR-9	0.281666	9.10839e-05	0.258326
initial crystal-RGPMR-9	0.281653	9.60519e-05	0.258172
initial crystal-RGPMR-9	0.281644	8.64559e-05	0.251788
initial crystal-RGPMR-9	0.281749	8.27686e-05	0.249322
initial crystal-RGPMR-9	0.281667	0.000129649	0.249935
initial crystal-RGPMR-9	0.281716	8.66092e-05	0.339815
initial crystal-RGPMR-9	0.281798	0.000105928	0.350369
initial crystal-RGPMR-9	0.281664	0.000121313	0.355684
initial crystal-RGPMR-9	0.281781	8.09132e-05	0.354559
initial crystal-RGPMR-9	0.28188	0.000107786	0.345083
initial crystal-RGPMR-9	0.281689	8.47642e-05	0.370379
initial crystal-RGPMR-9	0.28167	9.6034e-05	0.345732
initial crystal-RGPMR-9	0.281704	9.61766e-05	0.356121
initial crystal-RGPMR-9	0.281761	9.7503e-05	0.352264
initial crystal-RGPMR-9	0.281934	0.000103037	0.34091
initial crystal-RGPMR-9	0.281764	0.000106672	0.310163
initial crystal-RGPMR-9	0.281898	0.000102439	0.310513
initial crystal-RGPMR-9	0.28171	0.000105223	0.301268
initial crystal-RGPMR-9	0.281789	0.000109318	0.299709
initial crystal-RGPMR-9	0.281697	0.000110528	0.309333
initial crystal-RGPMR-9	0.281614	0.000107523	0.30684
initial crystal-RGPMR-9	0.281514	0.000104308	0.304386
initial crystal-RGPMR-9	0.281624	9.20275e-05	0.310096
initial crystal-RGPMR-9	0.281592	0.000102901	0.299837
initial crystal-RGPMR-9	0.281716	0.000100018	0.295195
initial crystal-RGPMR-9	0.281789	9.59369e-05	0.322155
initial crystal-RGPMR-9	0.281816	0.00010881	0.322786
initial crystal-RGPMR-9	0.281713	0.000101427	0.27841
initial crystal-RGPMR-9	0.281893	0.000118923	0.280524
initial crystal-RGPMR-9	0.28169	0.000110779	0.248087
initial crystal-RGPMR-9	0.281533	0.000115063	0.300454
initial crystal-RGPMR-9	0.281727	0.000103488	0.332071
initial crystal-RGPMR-9	0.281649	7.26565e-05	0.376527
initial crystal-RGPMR-9	0.281797	9.5536e-05	0.391374
initial crystal-RGPMR-9	0.281846	0.000204014	0.176893
initial crystal-RGPMR-9	0.281925	0.000217081	0.112465
initial crystal-RGPMR-4	0.281555	0.000238076	0.145202
initial crystal-RGPMR-4	0.281568	0.000189874	0.145771
initial crystal-RGPMR-4	0.281651	0.000194332	0.141853
initial crystal-RGPMR-4	0.281588	0.000224163	0.145429
initial crystal-RGPMR-4	0.281903	0.000205152	0.145036
initial crystal-RGPMR-4	0.281597	0.000227428	0.142583
initial crystal-RGPMR-4	0.281546	0.000253495	0.141239
initial crystal-RGPMR-4	0.281958	0.000198589	0.13956
initial crystal-RGPMR-4	0.281806	0.000210869	0.141989
initial crystal-RGPMR-4	0.282133	0.00024367	0.130419
initial crystal-RGPMR-4	0.281604	0.000270711	0.128902
initial crystal-RGPMR-4	0.281649	0.000289089	0.131211
initial crystal-RGPMR-4	0.281828	0.000184922	0.150544
initial crystal-RGPMR-4	0.281724	0.000198914	0.144653
initial crystal-RGPMR-4	0.281718	0.000241533	0.137368
initial crystal-RGPMR-4	0.281651	0.000247846	0.136647
initial crystal-RGPMR-14	0.281633	0.000371519	0.0885531
initial crystal-RGPMR-14	0.281573	0.000308777	0.0965899
initial crystal-RGPMR-14	0.281572	0.000299653	0.104378
initial crystal-RGPMR-14	0.282074	0.000259475	0.10989
initial crystal-RGPMR-14	0.281646	0.000314224	0.110297
initial crystal-RGPMR-14	0.281623	0.000147449	0.18399
initial crystal-RGPMR-14	0.281639	0.000152659	0.188111
initial crystal-RGPMR-14	0.282001	0.000169133	0.183977
initial crystal-RGPMR-14	0.281573	0.000174078	0.174954
initial crystal-RGPMR-14	0.281544	0.00029692	0.109987
initial crystal-RGPMR-14	0.281936	0.000267552	0.101469
initial crystal-RGPMR-14	0.281795	0.000250022	0.110408
initial crystal-RGPMR-14	0.281717	0.000328654	0.0874905
initial crystal-RGPMR-14	0.281746	0.000294587	0.0851749
initial crystal-RGPMR-14	0.282074	0.000350988	0.0887142
initial crystal-RGPMR-14	0.281546	0.000316313	0.0903206
initial crystal-RGPMR-14	0.282069	0.000263638	0.11367
initial crystal-RGPMR-14	0.281526	0.000223632	0.125983
initial crystal-RGPMR-14	0.281486	0.000235616	0.147091
initial crystal-RGPMR-14	0.282054	0.000196416	0.137897
initial crystal-RGPMR-14	0.281573	0.000227851	0.134903
initial crystal-RGPMR-14	0.281546	0.00021449	0.136348
initial crystal-RGPMR-14	0.281802	0.000186778	0.150344
initial crystal-RGPMR-14	0.282357	0.000226804	0.147144
initial crystal-RGPMR-14	0.281442	0.000197429	0.133767
initial crystal-RGPMR-14	0.281384	0.000261977	0.141776
initial crystal-RGPMR-14	0.281683	0.000220712	0.131419
initial crystal-RGPMR-14	0.28171	0.000180711	0.134597
initial crystal-RGPMR-14	0.281555	0.000212803	0.135215
initial crystal-RGPMR-14	0.281541	0.000269441	0.119782
initial crystal-RGPMR-14	0.281952	0.000238423	0.113707
initial crystal-RGPMR-14	0.281699	0.000325242	0.113233
initial crystal-RGPMR-14	0.281305	0.000333351	0.103581
initial crystal-RGPMR-14	0.281725	0.000350767	0.105799
initial crystal-RGPMR-14	0.281555	0.000293759	0.107455
initial crystal-RGPMR-14	0.282022	0.000244581	0.124828
initial crystal-RGPMR-14	0.282171	0.000301891	0.110132
initial crystal-RGPMR-14	0.281287	0.000331465	0.103951
initial crystal-RGPMR-3	0.281611	0.000358639	0.0885578
initial crystal-RGPMR-3	0.282074	0.000356203	0.0859832
initial crystal-RGPMR-3	0.281835	0.000430575	0.0868492
initial crystal-RGPMR-3	0.281986	0.000432644	0.0813887
initial crystal-RGPMR-3	0.282189	0.000418094	0.0792
initial crystal-RGPMR-3	0.281677	0.000486051	0.0807471
initial crystal-RGPMR-3	0.281912	0.000404735	0.0825979
initial crystal-RGPMR-3	0.282001	0.000387107	0.0829811
initial crystal-RGPMR-3	0.282087	0.000422752	0.0833097
initial crystal-RGPMR-3	0.281572	0.000431382	0.079567
initial crystal-RGPMR-3	0.282005	0.000476072	0.0718979
initial crystal-RGPMR-3	0.281611	0.000479417	0.0731274
initial crystal-RGPMR-3	0.281609	0.00038959	0.0748306
initial crystal-RGPMR-3	0.282059	0.000364392	0.0835754
initial crystal-RGPMR-3	0.28163	0.00035638	0.0848055
initial crystal-RGPMR-3	0.282105	0.000334528	0.0830654
initial crystal-RGPMR-6	0.281795	0.00044686	0.0691005
initial crystal-RGPMR-6	0.282593	0.000528873	0.067637
initial crystal-RGPMR-6	0.282009	0.000573153	0.0652247
initial crystal-RGPMR-6	0.281648	0.000567759	0.0619045
initial crystal-RGPMR-6	0.281651	0.000608661	0.057297
initial crystal-RGPMR-6	0.281828	0.000576278	0.0553234
initial crystal-RGPMR-6	0.281699	0.000549695	0.0557202
initial crystal-RGPMR-6	0.281912	0.000642385	0.0497198
initial crystal-RGPMR-6	0.281677	0.000714903	0.0516656
initial crystal-RGPMR-6	0.281466	0.000721919	0.0434282
initial crystal-RGPMR-6	0.281936	0.000740907	0.0473816
initial crystal-RGPMR-6	0.281824	0.000710895	0.0532722
initial crystal-RGPMR-6	0.281566	0.000624897	0.0554454
initial crystal-RGPMR-6	0.282005	0.000513565	0.0627856
initial crystal-RGPMR-6	0.282609	0.000434152	0.0677919
initial crystal-RGPMR-6	0.281958	0.000530245	0.0742148
initial crystal-RGPMR-18	0.282013	0.000128004	0.235525
initial crystal-RGPMR-18	0.281727	0.000121965	0.232627
initial crystal-RGPMR-18	0.281778	0.000116439	0.231515
initial crystal-RGPMR-18	0.281966	0.000114574	0.247069
initial crystal-RGPMR-18	0.281797	9.79282e-05	0.286525
initial crystal-RGPMR-18	0.281703	0.000155603	0.212912
initial crystal-RGPMR-18	0.281482	0.000137407	0.201383
initial crystal-RGPMR-18	0.281647	0.000156127	0.208184
initial crystal-RGPMR-18	0.281762	0.00017857	0.219637
initial crystal-RGPMR-18	0.281922	0.000142099	0.214671
initial crystal-RGPMR-18	0.281693	0.000125637	0.211333
initial crystal-RGPMR-18	0.281779	0.000178147	0.202677
initial crystal-RGPMR-18	0.281859	0.000150497	0.202703
initial crystal-RGPMR-18	0.28163	0.000119616	0.258142
initial crystal-RGPMR-18	0.281691	0.000153872	0.243452
initial crystal-RGPMR-18	0.281674	0.000163058	0.218729
initial crystal-RGPMR-18	0.281894	0.00015394	0.216385
initial crystal-RGPMR-18	0.281863	0.000174857	0.192829
initial crystal-RGPMR-18	0.281814	0.000165345	0.191385
initial crystal-RGPMR-18	0.281854	0.000142474	0.190435
initial crystal-RGPMR-18	0.281508	0.000160622	0.198737
initial crystal-RGPMR-18	0.281674	0.000163931	0.192854
Synthesized pellet-1	0.28141	0.000211732	0.132107
Synthesized pellet-1	0.281595	0.000241853	0.137104
Synthesized pellet-1	0.281568	0.000240405	0.134966
Synthesized pellet-1	0.28209	0.000165301	0.136019
Synthesized pellet-1	0.28161	0.000222232	0.118459
Synthesized pellet-1	0.282189	0.000279852	0.115749
Synthesized pellet-1	0.281531	0.000244379	0.115235
Synthesized pellet-1	0.281903	0.000251315	0.127846
Synthesized pellet-1	0.281623	0.000243571	0.117843
Synthesized pellet-1	0.281624	0.000215533	0.127887
Synthesized pellet-1	0.281718	0.000197031	0.12433
Synthesized pellet-1	0.281555	0.00020344	0.120626
Synthesized pellet-1	0.281641	0.000236609	0.127064
Synthesized pellet-1	0.281407	0.000213603	0.129907
Synthesized pellet-1	0.281941	0.000160966	0.129806
Synthesized pellet-1	0.281857	0.000236927	0.1265
Synthesized pellet-2	0.281568	0.000250222	0.112078
Synthesized pellet-2	0.281644	0.000235463	0.128173
Synthesized pellet-2	0.281503	0.000219733	0.132387
Synthesized pellet-2	0.281609	0.000164898	0.134842
Synthesized pellet-2	0.281856	0.000177778	0.145382
Synthesized pellet-2	0.282058	0.000217298	0.136115
Synthesized pellet-2	0.281558	0.000192372	0.121941
Synthesized pellet-2	0.282042	0.000167331	0.139075
Synthesized pellet-2	0.281868	0.00020924	0.134896
Synthesized pellet-2	0.281555	0.000154508	0.15744
Synthesized pellet-2	0.281652	0.000182539	0.139744
Synthesized pellet-2	0.281573	0.000184416	0.139018
Synthesized pellet-2	0.281626	0.000164043	0.167314
Synthesized pellet-2	0.281717	0.000171676	0.154933
Synthesized pellet-2	0.281643	0.000110437	0.156911
Synthesized pellet-2	0.281433	8.46317e-05	0.151761
Synthesized pellet-3	0.282068	0.00018657	0.127495
Synthesized pellet-3	0.281469	0.000205828	0.121289
Synthesized pellet-3	0.281611	0.000173971	0.136395
Synthesized pellet-3	0.28162	0.000190983	0.139625
Synthesized pellet-3	0.282069	0.000172125	0.139343
Synthesized pellet-3	0.282088	0.000215675	0.144843
Synthesized pellet-3	0.281623	0.000181382	0.141511
Synthesized pellet-3	0.281661	0.000187449	0.143535
Synthesized pellet-3	0.281597	0.000164051	0.145176
Synthesized pellet-3	0.281566	0.000182237	0.149197
Synthesized pellet-3	0.281607	0.000202259	0.137978
Synthesized pellet-3	0.281602	0.000153828	0.15129
Synthesized pellet-3	0.281618	0.000187164	0.140993
Synthesized pellet-3	0.281375	0.00016826	0.152329
Synthesized pellet-3	0.281857	0.000195851	0.144056
Synthesized pellet-3	0.28181	0.00021901	0.135774
Synthesized pellet-4	0.281623	0.000168487	0.162345
Synthesized pellet-4	0.281695	0.000229737	0.129458
Synthesized pellet-4	0.281699	0.000185333	0.130139
Synthesized pellet-4	0.282059	0.000197946	0.143696
Synthesized pellet-4	0.281626	0.000153489	0.152983
Synthesized pellet-4	0.282042	0.000197749	0.149595
Synthesized pellet-4	0.281824	0.000226393	0.138899
Synthesized pellet-4	0.281943	0.000150665	0.161436
Synthesized pellet-4	0.281835	0.000202195	0.13184
Synthesized pellet-4	0.28209	0.000197953	0.14305
Synthesized pellet-4	0.281981	0.000199027	0.151053
Synthesized pellet-4	0.281566	0.000182387	0.131267
Synthesized pellet-4	0.281724	0.000207452	0.152347
Synthesized pellet-4	0.281844	0.000194304	0.13513
Synthesized pellet-4	0.281406	0.000163397	0.130349
Synthesized pellet-4	0.281639	0.000224204	0.145601
Average	0.281746		0.169459
2SD	0.000406314		0.162636
n	225		225
RMJG	0.281585	0.00011933	0.861081
RMJG	0.28153	8.79374e-05	0.427313
RMJG	0.281596	5.0636e-05	0.83103
RMJG	0.28182	7.4363e-05	0.385242
RMJG	0.281704	7.98413e-05	0.812459
RMJG	0.28164	4.9625e-05	0.743559
RMJG	0.281579	6.19913e-05	0.794784
RMJG	0.281602	4.90958e-05	0.806899
RMJG	0.281698	6.49591e-05	0.594682
RMJG	0.281508	0.000113274	0.555598
RMJG	0.281436	7.69355e-05	0.523491
RMJG	0.281529	7.60454e-05	0.422856
RMJG	0.281684	4.49022e-05	0.703344
RMJG	0.281668	9.18447e-05	0.566309
RMJG	0.28159	9.03064e-05	0.43253
RMJG	0.281528	9.2028e-05	0.434346
RMJG	0.281643	8.78918e-05	0.530137
RMJG	0.281742	7.29278e-05	0.505277
RMJG	0.281588	5.60572e-05	0.631884
RMJG	0.281689	9.88675e-05	0.553866
RMJG	0.28161	6.66057e-05	0.613591
RMJG	0.281609	0.000106169	0.288519
RMJG	0.281628	5.995e-05	0.739938
RMJG	0.281625	6.10739e-05	0.558351
RMJG	0.281411	0.000159723	0.216244
RMJG	0.281623	5.58727e-05	0.565133
RMJG	0.281598	5.38815e-05	0.767813
RMJG	0.281751	0.00011713	0.240793
Average	0.281615		0.575252
2SD	0.000176337		0.353464
n	28		28

## Sheet: Table S5
Table S5 The Ti isotopic compositions of ultrafine powder in rutile RGPMR measured by solution-based MC-ICP-MS analysis.
Sample ID	Processed method	δ49TiOL-Ti (‰)	2SE
RGPMR -1	unpurity	0.534	0.01
RGPMR -1	unpurity	0.534	0.01
RGPMR -1	unpurity	0.524	0.02
RGPMR -2	unpurity	0.524	0.02
RGPMR -2	unpurity	0.544	0.02
RGPMR -2	unpurity	0.484	0.02
RGPMR -3	unpurity	0.494	0.02
RGPMR -3	unpurity	0.524	0.02
RGPMR -3	unpurity	0.524	0.02
RGPMR -4	unpurity	0.524	0.02
RGPMR -4	unpurity	0.534	0.02
RGPMR -4	unpurity	0.544	0.02
RGPMR -5	unpurity	0.474	0.02
RGPMR -5	unpurity	0.514	0.02
RGPMR -5	unpurity	0.544	0.02
RGPMR -6	unpurity	0.564	0.04
RGPMR -6	unpurity	0.564	0.03
RGPMR -6	unpurity	0.544	0.03
RGPMR -7	unpurity	0.524	0.03
RGPMR -7	unpurity	0.534	0.02
RGPMR -7	unpurity	0.514	0.02
RGPMR -8	purity	0.544	0.01
RGPMR -8	purity	0.534	0.02
RGPMR -8	purity	0.544	0.02
RGPMR -9	purity	0.524	0.02
RGPMR -9	purity	0.554	0.01
RGPMR -9	purity	0.504	0.02
RGPMR -10	purity	0.534	0.02
RGPMR -10	purity	0.534	0.02
RGPMR -10	purity	0.554	0.02
Average		0.529667
2SD		0.0412095
n		30

## Sheet: Table S6
Table S6 The Ti isotopic compositions of initial crystals and sintering-synthesized pellets of rutile RGPMR measured by fs-LA-MC-ICP-MS.
Sample ID	δ49TiOL-Ti (‰)	2SE
BRA10	-0.223	0.1
BRA10	-0.133	0.09
BRA10	-0.153	0.08
BRA10	-0.213	0.09
BRA10	-0.123	0.08
BRA10	-0.113	0.1
BRA10	-0.023	0.07
BRA10	-0.153	0.07
BRA10	-0.123	0.1
BRA10	-0.163	0.08
BRA10	-0.103	0.1
BRA10	-0.033	0.08
BRA10	-0.213	0.09
BRA10	-0.203	0.06
BRA10	-0.203	0.09
Average	-0.145
2SD	0.119822
n	15
USA75	0.367	0.07
USA75	0.357	0.08
USA75	0.177	0.07
USA75	0.217	0.08
USA75	0.247	0.08
USA75	0.287	0.09
USA75	0.317	0.07
USA75	0.417	0.1
USA75	0.287	0.08
USA75	0.207	0.09
USA75	0.267	0.08
USA75	0.317	0.08
USA75	0.237	0.06
USA75	0.317	0.06
USA75	0.337	0.09
Average	0.290333
2SD	0.12768
n	15
synthesized pellet-1	0.437	0.09
synthesized pellet-1	0.557	0.1
synthesized pellet-1	0.667	0.13
synthesized pellet-1	0.557	0.14
synthesized pellet-1	0.477	0.1
synthesized pellet-1	0.457	0.12
synthesized pellet-1	0.557	0.11
synthesized pellet-1	0.537	0.12
synthesized pellet-1	0.417	0.11
synthesized pellet-1	0.587	0.12
synthesized pellet-1	0.538	0.11
synthesized pellet-1	0.377	0.14
synthesized pellet-1	0.397	0.13
synthesized pellet-1	0.457	0.1
synthesized pellet-1	0.407	0.12
synthesized pellet-1	0.557	0.1
synthesized pellet-1	0.557	0.12
synthesized pellet-1	0.507	0.14
synthesized pellet-1	0.517	0.1
synthesized pellet-1	0.537	0.12
synthesized pellet-2	0.447	0.14
synthesized pellet-2	0.467	0.11
synthesized pellet-2	0.507	0.1
synthesized pellet-2	0.467	0.1
synthesized pellet-2	0.507	0.11
synthesized pellet-2	0.547	0.1
synthesized pellet-2	0.507	0.12
synthesized pellet-2	0.527	0.09
synthesized pellet-2	0.427	0.15
synthesized pellet-2	0.497	0.14
synthesized pellet-2	0.547	0.12
synthesized pellet-2	0.427	0.13
synthesized pellet-2	0.587	0.1
synthesized pellet-2	0.637	0.11
synthesized pellet-2	0.597	0.13
synthesized pellet-2	0.397	0.13
synthesized pellet-2	0.517	0.11
synthesized pellet-2	0.537	0.09
synthesized pellet-2	0.477	0.14
synthesized pellet-2	0.547	0.11
synthesized pellet-3	0.617	0.11
synthesized pellet-3	0.567	0.13
synthesized pellet-3	0.567	0.12
synthesized pellet-3	0.457	0.13
synthesized pellet-3	0.537	0.1
synthesized pellet-3	0.447	0.12
synthesized pellet-3	0.377	0.09
synthesized pellet-3	0.547	0.1
synthesized pellet-3	0.457	0.1
synthesized pellet-3	0.577	0.12
synthesized pellet-3	0.507	0.12
synthesized pellet-3	0.617	0.09
synthesized pellet-3	0.657	0.11
synthesized pellet-3	0.507	0.11
synthesized pellet-3	0.587	0.11
synthesized pellet-3	0.517	0.09
synthesized pellet-3	0.557	0.1
synthesized pellet-3	0.687	0.07
synthesized pellet-3	0.647	0.06
synthesized pellet-3	0.567	0.09
synthesized pellet-4	0.567	0.11
synthesized pellet-4	0.627	0.08
synthesized pellet-4	0.557	0.08
synthesized pellet-4	0.567	0.07
synthesized pellet-4	0.527	0.07
synthesized pellet-4	0.457	0.08
synthesized pellet-4	0.597	0.11
synthesized pellet-4	0.567	0.08
synthesized pellet-4	0.547	0.11
synthesized pellet-4	0.587	0.09
synthesized pellet-4	0.687	0.08
synthesized pellet-4	0.647	0.1
synthesized pellet-4	0.557	0.09
synthesized pellet-4	0.637	0.08
synthesized pellet-4	0.637	0.08
synthesized pellet-4	0.627	0.07
synthesized pellet-4	0.487	0.16
synthesized pellet-4	0.627	0.08
synthesized pellet-4	0.677	0.08
synthesized pellet-4	0.667	0.07
Average	0.539013
2SD	0.152262
n	80
initial crystal-RGPMR-3	0.701	0.06
initial crystal-RGPMR-3	0.711	0.07
initial crystal-RGPMR-3	0.441	0.05
initial crystal-RGPMR-3	0.811	0.06
initial crystal-RGPMR-3	0.691	0.07
initial crystal-RGPMR-3	0.661	0.08
initial crystal-RGPMR-3	0.321	0.05
initial crystal-RGPMR-3	0.441	0.06
initial crystal-RGPMR-3	0.461	0.07
initial crystal-RGPMR-3	0.461	0.06
initial crystal-RGPMR-3	0.671	0.05
initial crystal-RGPMR-3	0.651	0.06
initial crystal-RGPMR-3	0.651	0.07
initial crystal-RGPMR-3	0.701	0.06
initial crystal-RGPMR-3	0.671	0.06
initial crystal-RGPMR-3	0.501	0.06
initial crystal-RGPMR-3	0.561	0.06
initial crystal-RGPMR-3	0.501	0.05
initial crystal-RGPMR-4	0.341	0.06
initial crystal-RGPMR-4	0.381	0.05
initial crystal-RGPMR-4	0.391	0.06
initial crystal-RGPMR-4	0.421	0.06
initial crystal-RGPMR-4	0.301	0.07
initial crystal-RGPMR-4	0.411	0.06
initial crystal-RGPMR-4	0.561	0.04
initial crystal-RGPMR-4	0.581	0.05
initial crystal-RGPMR-4	0.401	0.06
initial crystal-RGPMR-4	0.521	0.06
initial crystal-RGPMR-4	0.511	0.05
initial crystal-RGPMR-4	0.441	0.06
initial crystal-RGPMR-4	0.561	0.06
initial crystal-RGPMR-4	0.551	0.05
initial crystal-RGPMR-4	0.491	0.05
initial crystal-RGPMR-4	0.521	0.07
initial crystal-RGPMR-4	0.631	0.07
initial crystal-RGPMR-4	0.541	0.05
initial crystal-RGPMR-4	0.391	0.07
initial crystal-RGPMR-4	0.521	0.05
initial crystal-RGPMR-4	0.351	0.07
initial crystal-RGPMR-4	0.711	0.06
initial crystal-RGPMR-4	0.301	0.06
initial crystal-RGPMR-4	0.821	0.06
initial crystal-RGPMR-6	0.626	0.06
initial crystal-RGPMR-6	0.596	0.05
initial crystal-RGPMR-6	0.626	0.06
initial crystal-RGPMR-6	0.636	0.06
initial crystal-RGPMR-6	0.686	0.04
initial crystal-RGPMR-6	0.786	0.05
initial crystal-RGPMR-6	0.686	0.06
initial crystal-RGPMR-6	0.846	0.05
initial crystal-RGPMR-6	0.946	0.05
initial crystal-RGPMR-6	0.736	0.05
initial crystal-RGPMR-6	0.886	0.06
initial crystal-RGPMR-6	0.676	0.06
initial crystal-RGPMR-6	0.606	0.04
initial crystal-RGPMR-6	0.526	0.07
initial crystal-RGPMR-9	0.756	0.04
initial crystal-RGPMR-9	0.796	0.04
initial crystal-RGPMR-9	0.846	0.06
initial crystal-RGPMR-9	0.646	0.06
initial crystal-RGPMR-9	0.666	0.05
initial crystal-RGPMR-9	0.966	0.05
initial crystal-RGPMR-9	0.586	0.05
initial crystal-RGPMR-9	0.616	0.05
initial crystal-RGPMR-9	0.496	0.05
initial crystal-RGPMR-9	0.546	0.06
initial crystal-RGPMR-9	0.486	0.06
initial crystal-RGPMR-9	0.736	0.06
initial crystal-RGPMR-9	0.796	0.05
initial crystal-RGPMR-9	0.736	0.06
initial crystal-RGPMR-9	0.506	0.07
initial crystal-RGPMR-9	0.526	0.07
initial crystal-RGPMR-14	0.581	0.05
initial crystal-RGPMR-14	0.571	0.04
initial crystal-RGPMR-14	0.611	0.05
initial crystal-RGPMR-14	0.781	0.04
initial crystal-RGPMR-14	0.791	0.05
initial crystal-RGPMR-14	0.781	0.05
initial crystal-RGPMR-14	0.581	0.04
initial crystal-RGPMR-14	0.621	0.05
initial crystal-RGPMR-14	0.571	0.04
initial crystal-RGPMR-18	0.641	0.06
initial crystal-RGPMR-18	0.681	0.09
initial crystal-RGPMR-18	0.601	0.09
initial crystal-RGPMR-18	0.661	0.07
initial crystal-RGPMR-18	0.851	0.09
initial crystal-RGPMR-18	0.741	0.08
Average	0.608011
2SD	0.295341
n	87

## Sheet: Table S7
Table S7. Elemental and Hf-Ti isotopic homogeneity of the initial crystals and synthesized pellets.
Sample Material	Element		MSbetween	MSwithin	F	Fcritical	ubb	ubb, rel (%)
Synthesized pellet	Sc	μg g-1	819	57.9	14.1	2.84	8.31	2.91
	TiO2	% m/m	5.53	0.068	81.4	2.84	0.71	0.74
	V	μg g-1	5294	1267	4.18	2.84	19.1	1.25
	Cr	μg g-1	12.5	13.5	0.92	2.84	0.53	0.80
	FeO	% m/m	451	215	2.10	2.84	4.63	2.10
	Zr	μg g-1	8.12	10.8	0.75	2.84	0.47	0.65
	Nb	μg g-1	114	84.6	1.35	2.84	1.64	0.95
	Sn	μg g-1	35.8	10.2	3.51	2.84	1.52	3.80
	Hf	μg g-1	1.76	2.15	0.82	2.84	0.21	0.58
	Ta	μg g-1	12.8	14.5	0.88	2.84	0.54	0.72
	W	μg g-1	62.4	14.8	4.21	2.84	2.08	4.50
	U	μg g-1	15.8	0.74	21.3	2.84	1.17	5.96
Initial crystal	Sc	μg g-1	94166	4150	22.7	2.31	74.9	40.7
	TiO2	% m/m	2.55	0.28	9.03	2.31	0.376	0.39
	V	μg g-1	8029793	70011	115	2.31	704.5	71.8
	Cr	μg g-1	47952130	230150	208.3	2.31	1726	138.8
	FeO	% m/m	0.758	0.007	115.1	2.31	0.216	19.1
	Zr	μg g-1	1450500	17250	84.1	2.31	299.1	78.4
	Nb	μg g-1	41250320	586500	70.3	2.31	1592	20.6
	Sn	μg g-1	18501200	260300	71.1	2.31	1066	65.2
	Hf	μg g-1	3156	62.4	50.6	2.31	13.9	63.2
	Ta	μg g-1	1045230	14210	73.5	2.31	253.5	54.1
	W	μg g-1	2253240	45150	49.9	2.31	371.1	45.2
	U	μg g-1	96.6	24.8	3.9	2.31	2.11	10.3
Table S7. Elemental and Hf-Ti isotopic homogeneity of the initial crystals and synthesized pellets.
Sample Material	isotopic composition		MSbetween	MSwithin	F	Fcritical	ubb
Synthesized pellet	176Hf/177Hf		0.000000000215	0.000000000248	0.86	2.76	0.0000021
Initial crystal	176Hf/177Hf		0.00000000352	0.00000000111	3.16	2.27	0.000042
Table S7. Elemental and Hf-Ti isotopic homogeneity of the initial crystals and synthesized pellets.
Sample Material	isotopic composition		MSbetween	MSwithin	F	Fcritical	ubb(‰)
Initial crystal	δ49TiOL-Ti (‰)		0.12	0.016	7.57	2.33	0.084
Synthesized pellet	δ49TiOL-Ti (‰)		0.00000000352	0.00000000111	6.33	2.72	0.038

## Sheet: Table S8
Table S8. Elemental and Hf-Ti isotopic values and their associated expanded uncertainties (k=2) for the synthesized pellets.
Element		Recommended value	Expanded uncertainty (k=2)
Sc	μg g-1	312.683	21
TiO2	% m/m	97.22	1.5
V	μg g-1	1467.74	64
Cr	μg g-1	2579.63	125
FeO	% m/m	1.1435	0.07
Zr	μg g-1	773.688	26
Nb	μg g-1	8817.34	442
Sn	μg g-1	694.43	69
Hf	μg g-1	36.8006	1.2
Ta	μg g-1	731.542	41
W	μg g-1	821.527	104
U	μg g-1	18.434	2.3
Table S8. Elemental and Hf-Ti isotopic values and their associated expanded uncertainties (k=2) for the synthesized pellets.
isotopic composition		Recommended value	Expanded uncertainty (k=2)
176Hf/177Hf		0.281728	2.6e-05
δ49TiOL-Ti (‰)		0.54	0.11
